# Supplementary material
Source: publisher site journal article supplement (https://www.dovepress.com/article/480272)
Supplement: Supplementary file 1 [file get_supplementary_file.php]

**Revised Supplementary Material**

**STable 1.** Primary and secondary outcomes and safety events of the patients in the P, PM and PD group.

|  | Total  n=120 | P  n=57 | PM  n=39 | PD  n=24 | p | OR  95% CI | p |
| --- | --- | --- | --- | --- | --- | --- | --- |
| Primary endpoint | | | | | | | |
| Delirium, n (%) | 20 (16.7) | 4 (7.0) | 11(28.2) | 5 (20.8) | 0.016 | 1.025  (1.004,1.046) | 0.018 |
| Secondary endpoints | | | | | | | |
| Sedation success rate (%), mean (SD) | 4.26(13.18) | 82.52  (15.16) | 88.97  (9.32) | 80.71  (11.71) | 0.021 |  |  |
| Extubation time (h), mean (SD) | 1.63  (2.87) | 1.61  (3.49) | 1.68  (1.74) | 1.60  (2.85) | 0.581 |  |  |
| Duration of mechanical ventilation (d), mean (SD) | 2.19  (1.58) | 1.94  (1.86) | 2.47  (1.14) | 2.32  (1.44) | 0.019 |  |  |
| LOS ICU, mean (SD) | 3.32 (1.55) | 2.81 (1.54) | 3.94 (1.43) | 3.50 (1.38) | 0.001 |  |  |
| LOS hospital, mean (SD) | 20.77  (7.89) | 19.54  (5.80) | 21.13  (10.31) | 23.08  (7.41) | 0.078 |  |  |
| Safety events, n (%) | | | | | | | |
| Hypotension | 43 (35.83) | 17 (29.82) | 14 (35.90) | 12 (50.00) | 0.224 |  |  |
| Bradycardia | 35 (29.17) | 17 (29.82） | 10 (25.64) | 8 (33.33) | 0.799 |  |  |
| Hypertension | 29 (24.17) | 13 (22.81) | 11 (28.21) | 5 (20.83) | 0.760 |  |  |
| Postoperative fever | 16 (13.33) | 5 (8.77) | 7 (17.95) | 4 (16.67) | 0.372 |  |  |
| Cerebral infarction | 0 (0) | 0 (0) | 0 (0) | 0 (0) | / |  |  |
| Cerebral hemorrhage | 0 (0) | 0 (0) | 0 (0) | 0 (0) | / |  |  |
| Cardiac arrest | 1 (0.83) | 1 (1.75) | 0 (0) | 0 (0) | / |  |  |
